# Supplementary material for: TBX2 is a neuroblastoma core regulatory circuitry component enhancing MYCN/FOXM1 reactivation of DREAM targets
Source: PubMed Central journal article supplement (PMC6242972; doi:10.1038/s41467-018-06699-9), 2018-11-19
Supplement: 41467_2018_6699_MOESM3_ESM.pdf [file 41467_2018_6699_MOESM3_ESM.pdf]

## Description of Additional Supplementary Files

File Name: Supplementary Data 1

Description: De novo and known homer motif enrichment ( $p.val < 1e-10$ ) in the TBX2 bound regions in IMR-32 cells.

File Name: Supplementary Data 2

Description: Significantly up- and down-regulated genes ( $adj.P.Val < 0.05$ ) upon TBX2 knockdown in the IMR-5/75 cell line.

File Name: Supplementary Data 3

Description: Enriched genesets (MsigDB Hallmarks ( $FDR < 0.05$ ), C5.bp ( $FDR < 0.01$ ), C2 ( $FDR < 0.05$  with max top 50)) in the down- and up-regulated genes upon shTBX2 KD in CLB-GA and IMR-5/75.

File Name: Supplementary Data 4

Description: iRegulon enrichment table for up- and down-regulated genes upon TBX2 KD in CLB-GA and IMR-5/75, and the additively or synergistically up- and down-regulated genes upon TBX2 and MYCN KD in IMR-5/75.

File Name: Supplementary Data 5

Description: Significantly up- and down-regulated genes ( $adj.P.Val < 0.05$ ) upon TBX2 knockdown in the CLB-GA cell line.

File Name: Supplementary Data 6

Description: Significantly synergistically up- and down-regulated genes upon THZ1 and JQ1 combination treatment, (excluded when significant effect of the single compounds) ( $adj.P.Val$  and log fold change of the combination vs control comparison are depicted)
